# Supplementary material for: Comparison of femtosecond laser-assisted cataract surgery and conventional phacoemulsification on corneal impact: A meta-analysis and systematic review
Source: PubMed Central journal article supplement (PMC10104330; doi:10.1371/journal.pone.0284181), 2023-04-14
Supplement: pone.0284181.s006.pdf [file pone.0284181.s006.pdf]

| author        | year | country   | Selection | Comparability | Outcome | Total score |
|---------------|------|-----------|-----------|---------------|---------|-------------|
| Abell         | 2014 | Australia | ****      | *             | ***     | *****       |
| Abell         | 2013 | Australia | ****      | *             | ***     | *****       |
| Al-Mohtaseb   | 2017 | USA       | ****      | *             | ***     | *****       |
| Cavallini     | 2019 | Italy     | ****      | *             | ***     | *****       |
| Chen          | 2017 | China     | ****      | *             | ***     | *****       |
| Kanellopoulos | 2016 | Greece    | ****      | *             | ***     | *****       |
| Kelkar        | 2020 | India     | ****      | *             | ***     | *****       |
| Krarp         | 2014 | Denmark   | ****      | *             | ***     | *****       |
| Mencucci      | 2020 | Italy     | ****      | *             | ***     | *****       |
| Pisciotta     | 2018 | Italy     | ****      | *             | ***     | *****       |
| Ranjini       | 2017 | India     | ****      | *             | ***     | *****       |
| Reddy         | 2021 | India     | ****      | *             | ***     | *****       |
| Yu            | 2015 | China     | ****      | *             | ***     | *****       |
| Yu            | 2016 | China     | ****      | *             | ***     | *****       |
| Duan          | 2017 | China     | ****      | *             | ***     | *****       |
| Gao           | 2018 | China     | ****      | *             | ***     | *****       |
| Liu           | 2016 | China     | ****      | *             | ***     | *****       |
| Niu           | 2018 | China     | ****      | *             | ***     | *****       |
| Yang          | 2019 | China     | ****      | *             | ***     | *****       |

**S3 Table. The Newcastle-Ottawa Scale (NOS) of cohort studies.**
